# Supplementary material
Source: MDPI journal article supplement (https://www.mdpi.com/2072-4292/12/10/1600)
Supplement: s1 [file s1]

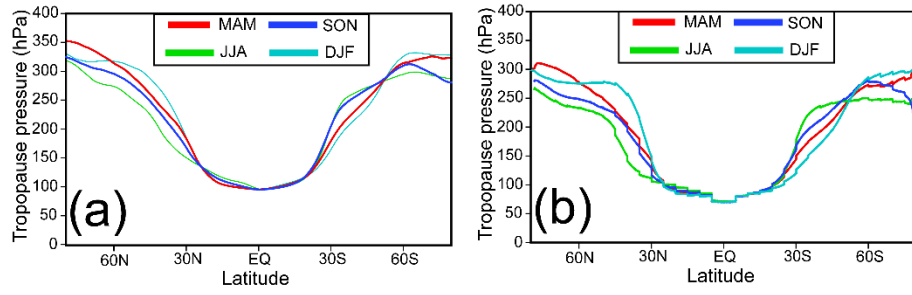

**Figure S1.** The meridional distributions of tropopause height during four seasons in 2018 (DJF: December, January, and February; MAM: March, April, and May; JJA: June, July, and August; SON: September, October, and November) based on a) ERA-Interim reanalysis; b) Fengyun-4A retrievals.
